# Supplementary material for: Protein Z: A putative novel biomarker for early detection of ovarian cancer
Source: PubMed Central journal article supplement (PMC4840324; doi:10.1002/ijc.30020), 2016-02-19

A

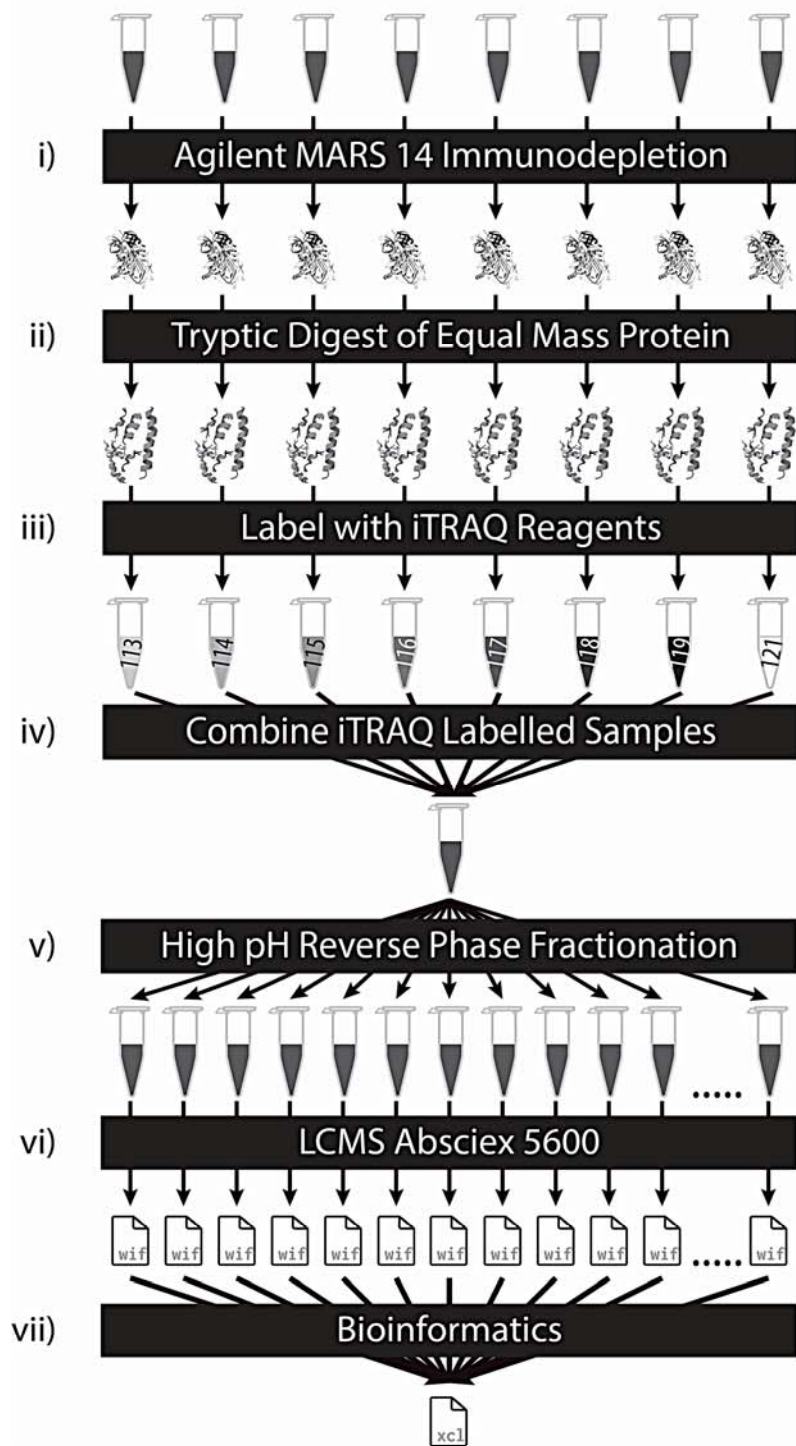

B

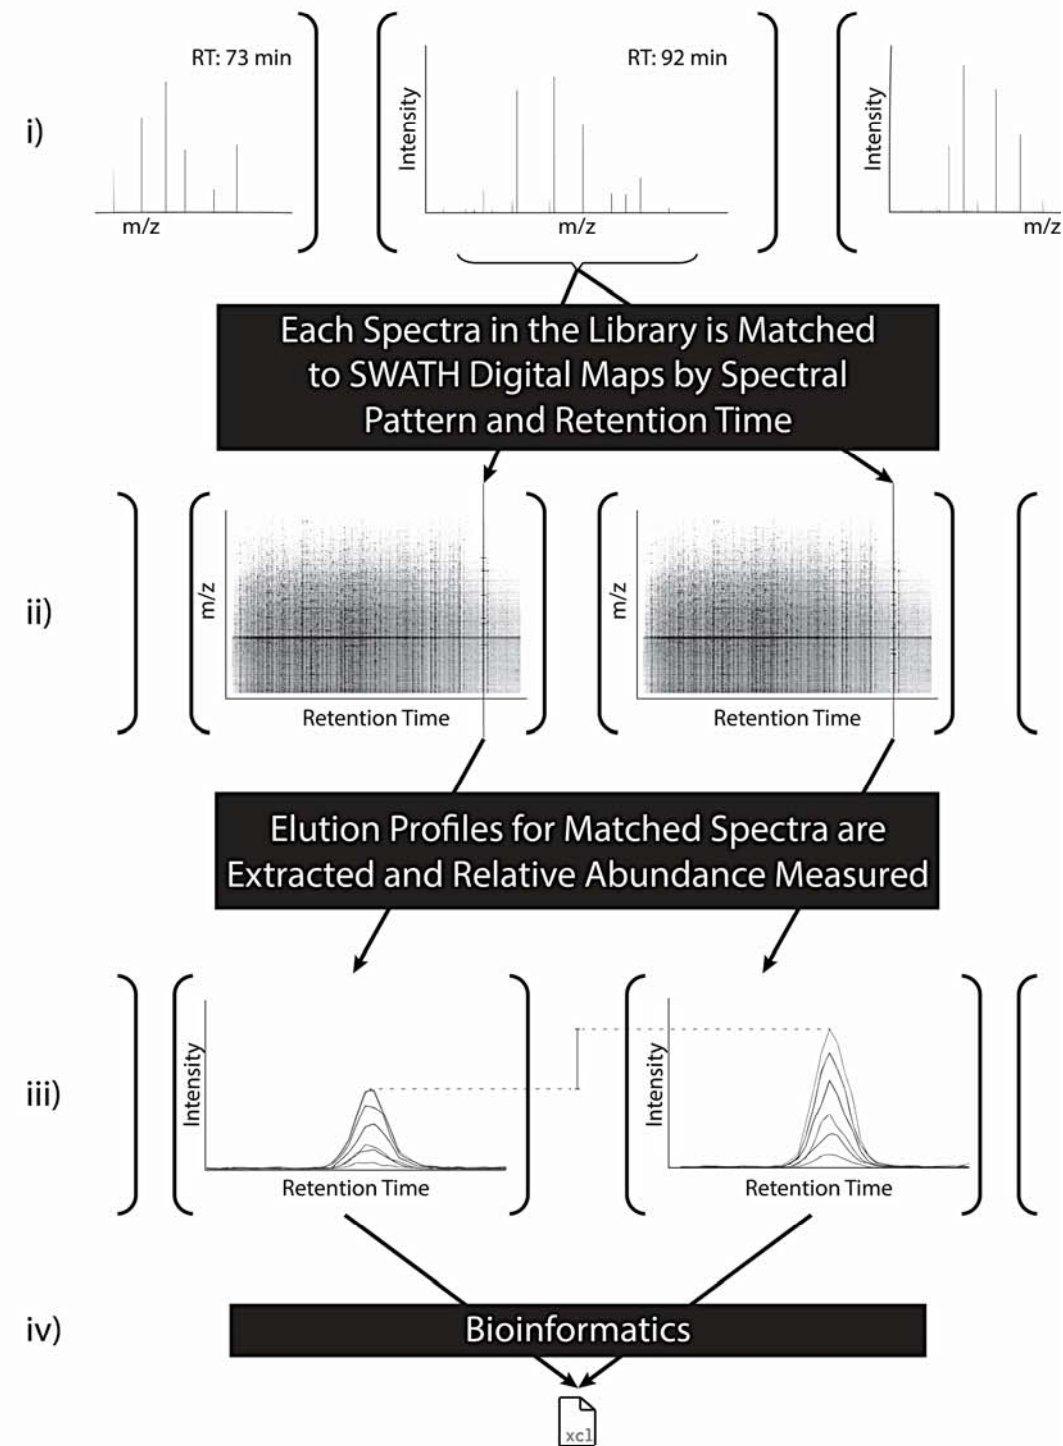

Supplement: IJC-138-2984-s002.pdf [file IJC-138-2984-s002.pdf]
