# Supplementary material for: Protein Z: A putative novel biomarker for early detection of ovarian cancer
Source: PubMed Central journal article supplement (PMC4840324; doi:10.1002/ijc.30020), 2016-02-19

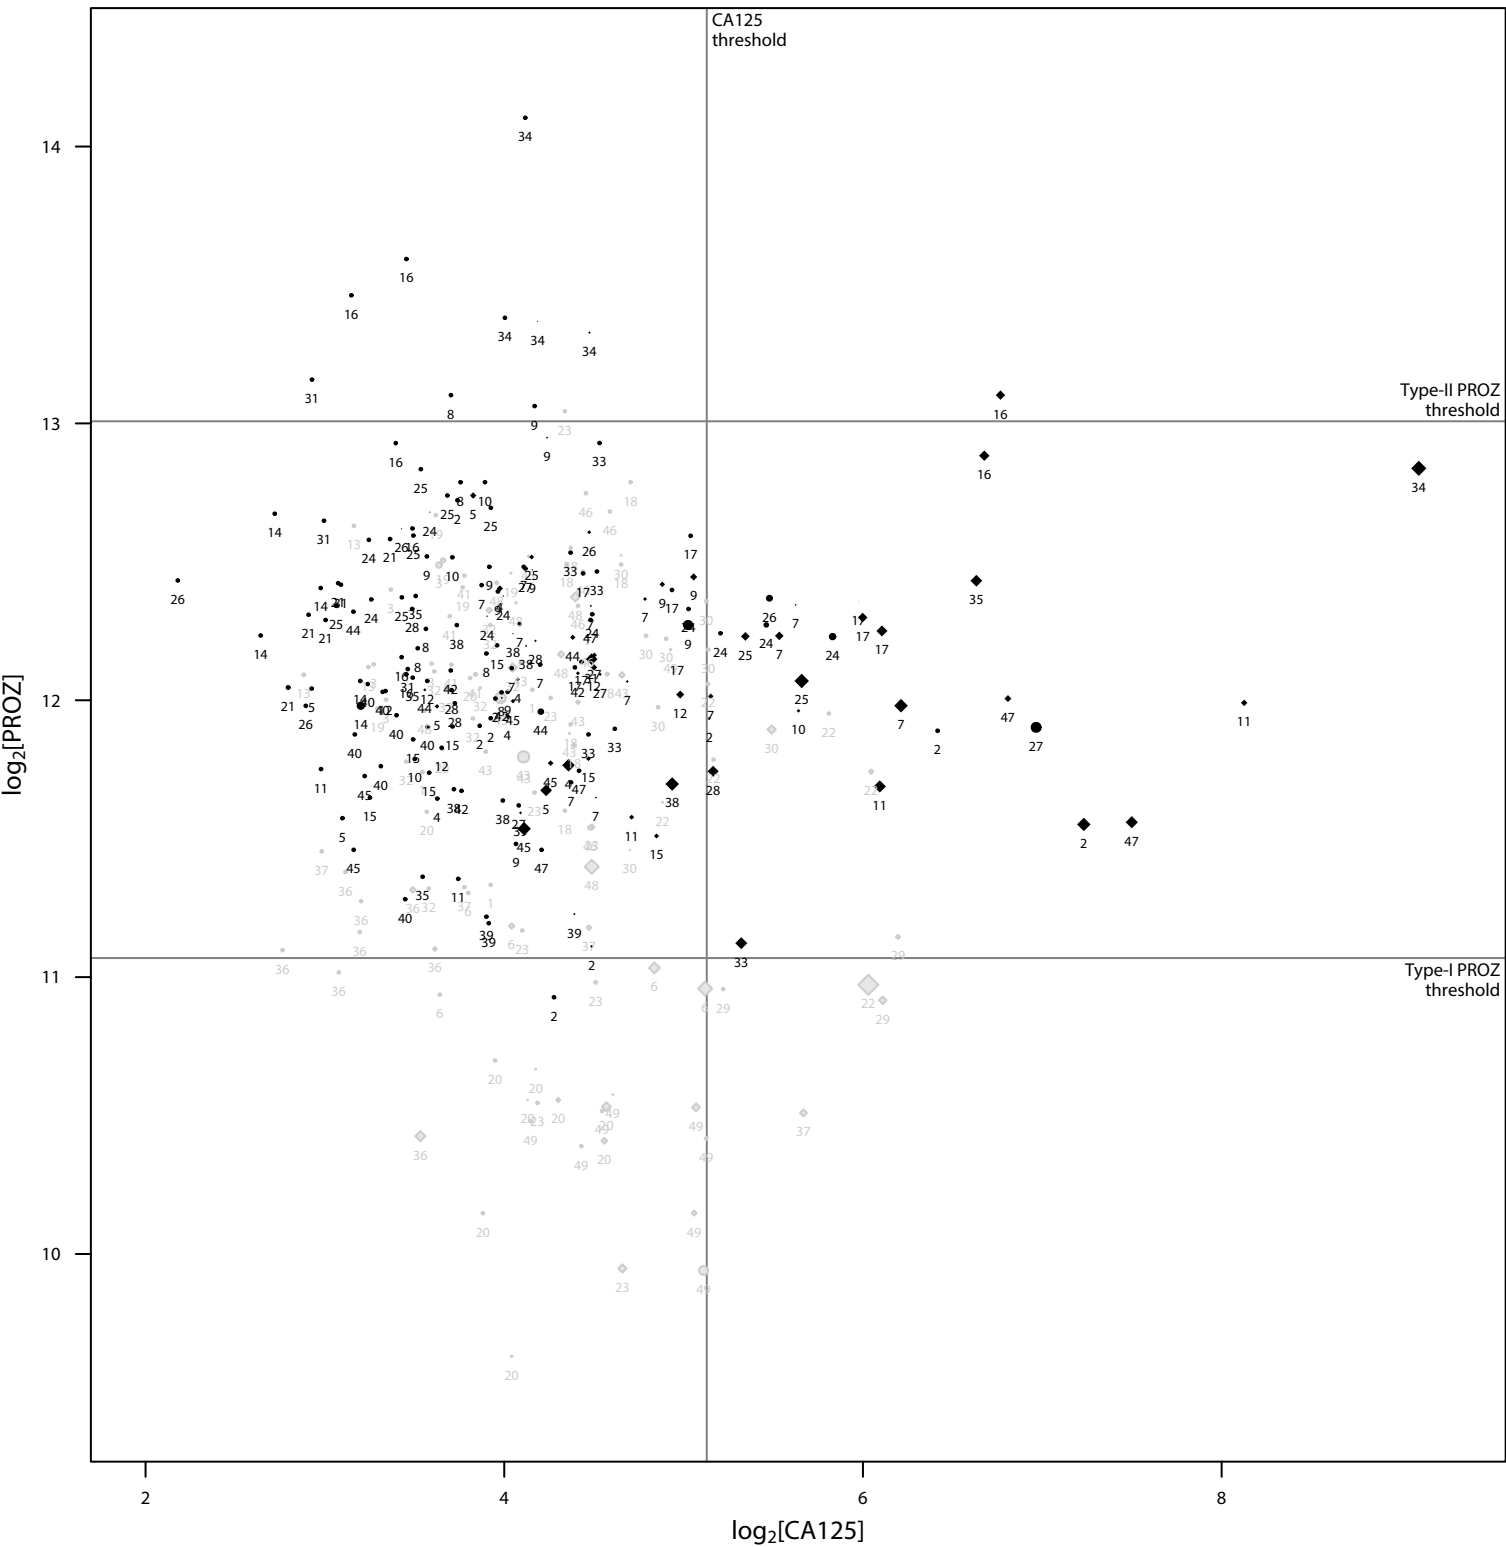

Supplement: IJC-138-2984-s004.pdf [file IJC-138-2984-s004.pdf]
